# Supplementary material
Source: PubMed Central journal article supplement (PMC5546403)
Supplement: NIHMS882052-supplement-supplement_1.pdf [file NIHMS882052-supplement-supplement_1.pdf]

## La motif →

2° (NMR)

H.sapiens TASGGENE-REDLEQEWKPPDEELIKKLVLDQIEFYFSDENLEKDAFLKHKVRRNKLGYVSVKLLTSFKKVKHLTRDWRRTTAHALKYSVVL  
 F.catus TTSSGGENE-HEDGEQEWKPPDQELIRKLVLDQIEFYFSDANLEKDAFLKHKVRRNKLGYVSVKLLTSFKKVKHLTRDWRRTTAHALKYSMSL  
 M.musculus TTSSGGEND-REDLEPEWRPPDEELIRKLVLDQIEFYFSDENLEKDAFLKHKVRRNKLGYVSVKLLTSFKKVKHLTRDWRRTTAHALKYSVTL  
 C.hircus TTSSGGENE-RDDLEQEWPQPPDEELIKKLVLDQIEFYFSDENLEKDAFLKHKVRRNKLGYVSVKLLTSFKKVKHLTRDWRRTTAHALKYSVTL  
 B.taurus TTSSGGENE-RDDLEQEWPQPPDEELIKKLVLDQIEFYFSDENLEKDAFLKHKVRRNKLGYVSVKLLTSFKKVKHLTRDWRRTTAHALKYSVTL  
 R.norvegicus TTSSGGEND-REDLEPEWKPPDEELIKKLVLDQIEFYFSDENLEKDAFLKHKVRRNKLGYVSVKLLTSFKKVKHLTRDWRRTTAHALKYSVTL  
 G.gallus KASGGEND--DDSDQNWKPPENDLIQKLIQIAQIEFYFSDENLEKDAFLKHKVRRNKMGYVSVKLLTSFKKVKHLTRDWRRTTAHALKYSMDL  
 M.gallopavo NSSGGEND--DDSDQNWKPPENDLIQKLIQIAQIEFYFSDENLEKDAFLKHKVRRNKMGYVSVKLLTSFKKVKHLTRDWRRTTAHALKYSMDL  
 C.cornix APCGGEND--DDSDQNWKPPKDLIQLKLIQIAQIEFYFSDENLEKDAFLKHKVRRNKMGYVSVKLLTSFKKVKHLTRDWRRTTAHALKYSNTL  
 P.adeliae RRNGGEND--DDSDQKWKPPENDLIQKLIQIAQIEFYFSDENLEKDAFLKHKVRRNKMGYVSVKLLTSFKKVKHLTRDWRRTTAHALKYSIDL  
 C.pelagica VGSGGEND--DDSDQNWKPPENDLIQKIIAQIEFYFSDENLEKDAFLKHKVRRNKMGYVSVKLLTSFKKVKHLTRDWRRTTAHALKYSIDL  
 O.hoazin O.hoazin FDF'TETLD-DSSYEGDSGIPDLKLVKIVSQVEFYLSDENLSDAFLLKHVQKNKMGYVSIKLLTSFKKIKYLTRDWRKTYALRFSEQL  
 X.tropicalis ATSSGGEND-GDELQDQWKPDAELIQLKLIQIAQIEFYFSDENLEKDAFLKHKVRRNKMGYVSVKLLTSFKKVKHLTRDWRRTTAHALKYSIDL  
 X.laevius ATSSGGEND-GDELQDQWKPDAELIQLKLIQIAQIEFYFSDENLEKDAFLKHKVRRNKMGYVSVKLLTSFKKVKHLTRDWRRTTAHALKYSIDL  
 E.lucius GTSSGGELE-----EESWQPPDELTQKLVQIEFYFSDENLEKDAFLKHKVRRNKLGFVSVKLLTSFKKVKHLTRDWRRTTAHALKYSIDL  
 O.latipes GTSSGGELE-----EESWQPPDELTQKLVQIEFYFSDENLEKDAFLKHKVRRNKLGFVSVKLLTSFKKVKHLTRDWRRTTAHALKYSIDL  
 T.rubripes GTSSGGELE-----DESWKPPDELTQKLVQIEFYFSDENLEKDAFLKHKVRRNKLGFVSVKLLTSFKKVKHLTRDWRRTTAHALKYSIDL  
 D.rerioA GTSSGGELE-----EESWQPPDELTQKLVQIEFYFSDENLEKDAFLKHKVRRNKLGFVSVKLLTSFKKVKHLTRDWRRTTAHALKYSIDL  
 D.rerioB TDLTDVFEEDFCGELWIPNDVDTQIATQLENYLSDENLSDAFLLKHVQRNKMGYVSVKLLTSFKKIRDLTRDWRRTTAAARTSPQL  
 X.maculatus GTSSGGELE-----EESWQPPDELTQKLVQIEFYFSDENLEKDAFLKHKVRRNKLGFVSVKLLTSFKKVKHLTRDWRRTTAHALKYSIDL  
 Consensus\_aa .s.ssp.-.....-pWbPP-.-LhpK11sQ1E@YhSDENLp+DAFLKHKVpRNKhG@Vs1KLLTSFKK1KcLTRDWRRTT@AL+@s..L

2° (NMR)

H.sapiens ELNEDHRKVRRTTPVPLFPNENLPSKMLLVYDLYLSPKLWALAT-----PQKNGRVQEKVMEHLLKLFGTFGVISSVRLKPGRELPP  
 F.catus ELNEDHRKVRRTTPVPLFPNENLPSKMLLVYDLYLSPKLWALAT-----PQKNGRVQEKVMEHLLKLFGTFGVISSVRLKPGRELPP  
 M.musculus ELNEDHRKVRRTTPVPLFPNENLPSKMLLVYDLHLSPKLWALAT-----PQKNGRVQEKVMEHLLKLFGTFGVISSVRLKPGRELPP  
 C.hircus ELNEDHRKVRRTTPVPLFPNENLPSKMLLVYDLYLSPKLWALAT-----PQKNGRVQEKVMEHLLKLFGTFGVISSVRLKPGRELPP  
 B.taurus ELNEDHRKVRRTTPVPLFPNENLPSKMLLVYDLYLSPKLWALAT-----PQKNGRVQEKVMEHLLKLFGTFGVISSVRLKPGRELPP  
 R.norvegicus ELNEDHRKVRRTTPVPLFPNENLPSKMLLVYDLHLSPKLWALAT-----PPKNGRVQEKVMEYLLKLFGTFGVISSVRLKPGRELPP  
 G.gallus ELNDDNRKVRRTTPVPVFPSENLPTRMLLVYDIHMISELQGLN-----QENGCIQEKVMEYLLKAFVTFGVISSVRLKPGRELPP  
 M.gallopavo ELNDDNRKVRRTTPVPVFPSENLPTRMLLVYDIHMISELQGL-K-----QENGCIQEKVMEYLLKAFVTFGVISSVRLKPGRELPP  
 C.cornix ELNDDNRKVRRTTPVPVFPSENLPTRMLLVYDIHMISELQTLN-----EENGCMQERIMEHLLKAFVTFGVISSVRLKPGRELPP  
 P.adeliae ELNDDNRKVRRTTPVPVFPSENLPTRMLLVYDIHMISELQALN-----QQENGCMQERIMEHLLKAFVTFGVISSVRLKPGDLPP  
 C.pelagica ELNDDNRKVRRTTPVPVFPSENLPTRMLLVYDIHMISELQALN-----QQENGCMQERIMEHLLKAFVTFGVISSVRLKPGDLPP  
 O.hoazin ELNDDNRKVRRTTPVPVFPSENLPTRMLLVYDIHMISELQTHN-----QQENGCMQERIMEHLLKAFVTFGVISSVRLKPGDLPP  
 X.tropicalis EVNDEETKVRRTTPVPLFPNENLPSKMLLVYDLYLSPKLWALAT-----RSFSCQKLNMEIVTSVFATYGLTISRILKPKGKEVPS  
 X.laevius ELNEDNRKIRRTPVPVFPSENLPKMLLVYDLHFIPELNLCLGK-----EQENGGMQEKIMEHLLKSFAGFVGISSVRLKPGRELPP  
 E.lucius ELNEEGRKVRRTTPVPVFPASELPSRMLLLSDLQSWPELGVMEAGAGDGSSEGGATQEQQLMKLLKAFGTGFAIASVRLKPGDLPA  
 O.latipes ELNEEGRKVRRTTPVPVFPASELPSRMLLLSDLQKWPDLAVLTK---ENGSGEGGATQEQQLMKLLKAFGTGFAIASVRLKPGDLPA  
 T.rubripes ELNEEGRKVRRTTPVPVFPASELPSRMLLLSDLQKWPDLAVLTK---DPGGEGGPPQEQQLMKLLKAFGTGFAIASVRLKPGDLPA  
 D.rerioA ELNDEGRKVRRTTPVPVFPASELPSRMLLLSELKRWPELGIALG---GDSNNGSGPTQERLMEHLLKAFGNYGPIASVRLKPGDLPA  
 D.rerioB EVNEMGTKVRRTTPVPDWLICPTSKLLLAWNFLDAGAPVKE-K-----FESPGVEQLGIMEAAMRVFSPYGTISSLRILRPGKEIPA  
 X.maculatus ELNDEGRKVRRTTPVPVFPASELPSRMLLLSDLQKWPDLAVLTK---DNNGSNGGATQEQQLMKLLKAFGTGFAIASVRLKPGDLPA  
 Consensus\_aa E1N-.-pKVRrposVps@.....Po+hLL1.s1...sc...bsp.....ppstsbQcp1MEhh+hFts@GhIoSlR1LKPG+-1Ps

2° (NMR)

H.sapiens DIRRISSRYSQVGTQECALVEFEEVEAAIKAEHFMTES--QGKEN-MKAVLIGMKPPKKPKD-KNHDEEP--TASIHNLKSLNKRVE  
 F.catus DIRRVSSRYSQVGTQECALVEFEEVEAAIKAEHFMTES--QGREN-MKAVLIGMKPPKKPKD-KNQDEEP--TASIHNLKSLNKRVE  
 M.musculus DIRRISSRYSQVGTQECALVEFEEVEAAIKAEHFMTES--QSKEN-MKAVLIGMKPPKKPKD-KNHDEA--TAGTHLSRSLNKRVE  
 C.hircus DIRRISNRYSQVGTQECALVEFEEVEAAIKAEHFMTES--QGREN-MKAVLIGMKPPKKPKD-KNHDEEP--TASIHNLKSLNKRVE  
 B.taurus DIRRISNRYSQVGTQECALVEFEEVEAAIKAEHFMTES--QGREN-MKAVLIGMKPPKKPKD-KNHDEEP--TASIHNLKSLNKRVE  
 R.norvegicus DIRRISSRYSQVGTQECALVEFEEVEAAIKAEHFMTES--QGKEN-MKAVLIGMRPPKKPKD-KNHDEEP--AAGTRLSRSLNKRVE  
 G.gallus DIRRFSSRYTQMGTECALVEFEEVEAAIKAEHFMTES--KETG-MKVVLIGMKPPKKVPKD-KNHDEEDS--SKSLKIRSLNKRVE  
 M.gallopavo DIRRFSSRYTQMGTECALVEFEEVEAAIKAEHFMTES--KETG-MKVVLIGMKPPKKVPKD-KNRDED--SKSLKIRSLNKRVE  
 C.cornix DIRRVSNRYTQMGTECALVEFEEVEAAIKAEHFMTES--KETG-MKVVLIGMKPPKKVPKD-KNRDED--SKSLKIRSLNKRVE  
 P.adeliae DIRRVSSRYTQMGTECALVEFEEVEAAIKAEHFMTES--KETG-MKVVLIGVKKPPKKVPKD-KNHDEEDT--SKSLKARSLNKRVE  
 C.pelagica DIRRVSNRYTQMGTECALVEFEEVEAAIKAEHFMTES--KETG-MKVVLIGMKPPKKVPKD-KNHDEEDT--SKSLKARSLNKRVE  
 O.hoazin DIRRVSNRYTQMGTECALVEFEEVEAAIKAEHFMTES--KETG-MKVVLIGMKPPKKVPKD-KNCDEGT--SKSLKARSLNKRVE  
 X.tropicalis DIRKYSRYPELSTRNCALVEFEEVEAAIKAEHFMTES--SSTNIDRIKIVPVSGRGTRKKNVID-TAEQEDL-DLPDKMTRKEIRAME  
 X.laevius DVKRFSSRYTQMGTECALVEFEEVEAAIKAEHFMTES--TDEDG-LKVVLIGMKPPKKVPKD-KSKEED--SKNVRNKLNKRVE  
 E.lucius DLKLLSGRYTQMGTECALVEFEEVEAAIKAEHFMTES--SLG-LKVVLIGTKPPKKVPKDQRQREEG--VGGMRKSRSLNKRVE  
 O.latipes DLKRLSGRYTQMGTECALVEFEEVEAAIKAEHFMTES--SLG-LKVVLIGTKPPKKVPKE-RPREE--GGMRKSRSLNKRVE  
 T.rubripes DLKRLSGRYTQMGTECALVEFEEVEAAIKAEHFMTES--SLG-LKVVLIGTKPPKKVPKE-RPREE--GGMRKSRSLNKRVE  
 D.rerioA DLKLLSGRYTQMGTECALVEFEEVEAAIKAEHFMTES--SLG-LKVVLIGTKPPKKVPKD-RPRDEG--IGMRKSRSLNKRVE  
 D.rerioB ELKRYTKHLELGRKVCVVVEYEELEAGKAFALVVEE-QQGGG-ICVVLIGSRGTRKPGCSQ-GLVDEEQEDCIDIVLKRPRDKAR  
 X.maculatus DLKRLSGRYTQMGTECALVEFEEVEAAIKAEHFMTES--SLG-LKVVLIGTKPPKKVPKE-RPREE--GGMRKSRSLNKRVE  
 Consensus\_aa D1++hosRYsp1tsppCA1VE@Ep1-tA.+Ah-hh.sc.....s.hKVVLIG.+ss+KKssp-.p.-.-E-.....sh+b.+pbsp+hC

Supplemental Figure 1.

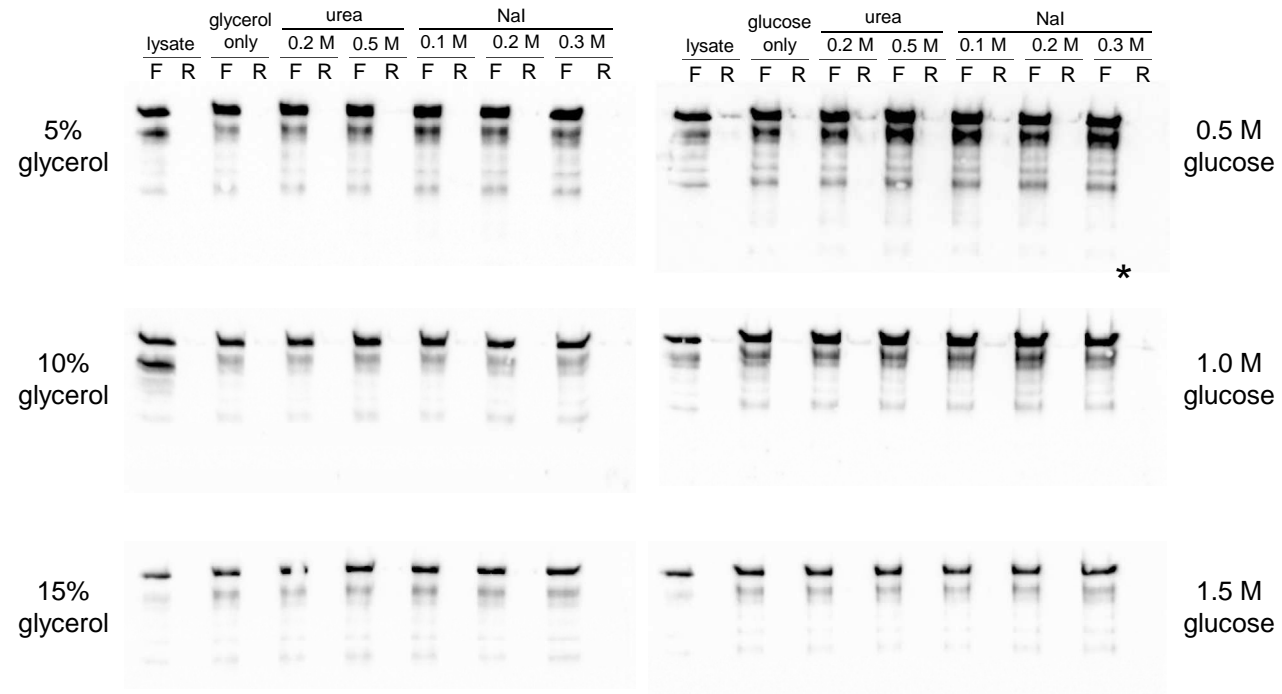

Supplemental Figure 2.

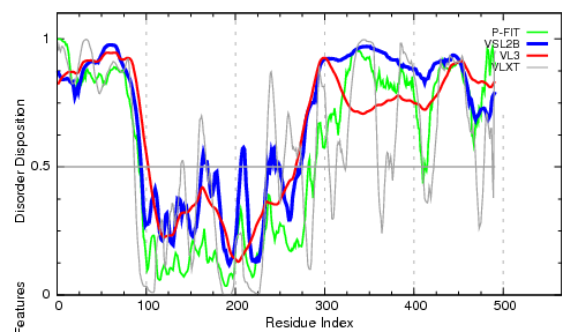***HsLARP6***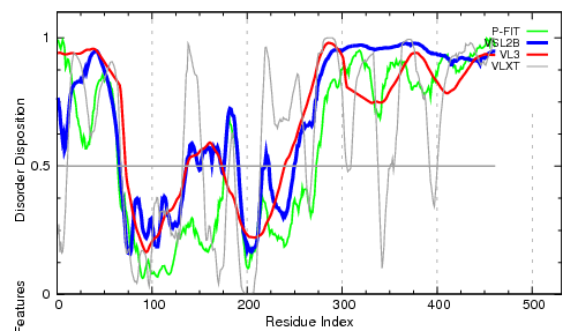***XmLARP6***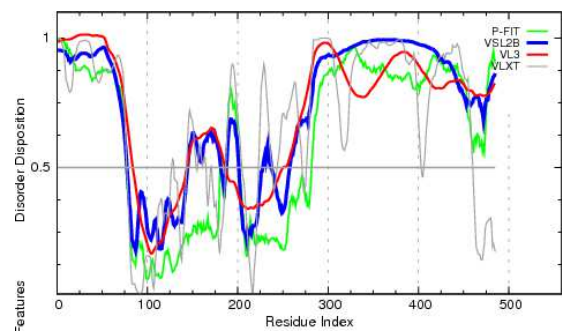***DrLARP6a*****Supplemental Figure 3.**
